# Supplementary material for: Elucidation of Spatial Distribution of Hydrophobic Aromatic Compounds Encapsulated in Polymer Micelles by Anomalous Small-Angle X-ray Scattering
Source: PubMed Central journal article supplement (PMC6415145; doi:10.3390/polym10020180), 2018-02-12
Supplement: polymers-10-00180-s001.pdf [file polymers-10-00180-s001.pdf]

Supplementary materials for

**Elucidation of Spatial Distribution of Hydrophobic  
Aromatic Compounds Encapsulated in Polymer  
Micelles by Anomalous Small-angle X-ray  
Scattering**

*Shota Sasaki, Ginpei Machida, Ryosuke Nakanishi, Masaki Kinoshita, and Isamu Akiba\**

GPC elugrams and  $^1\text{H-NMR}$  spectrum for PEG-*b*-PtBMA.

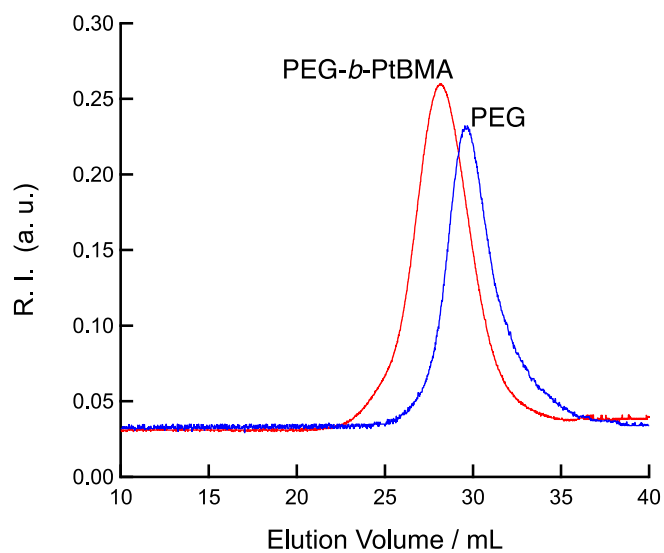

Figure S1. GPC elugrams of PEG (blue) and PEG-*b*-PtBMA (Red).

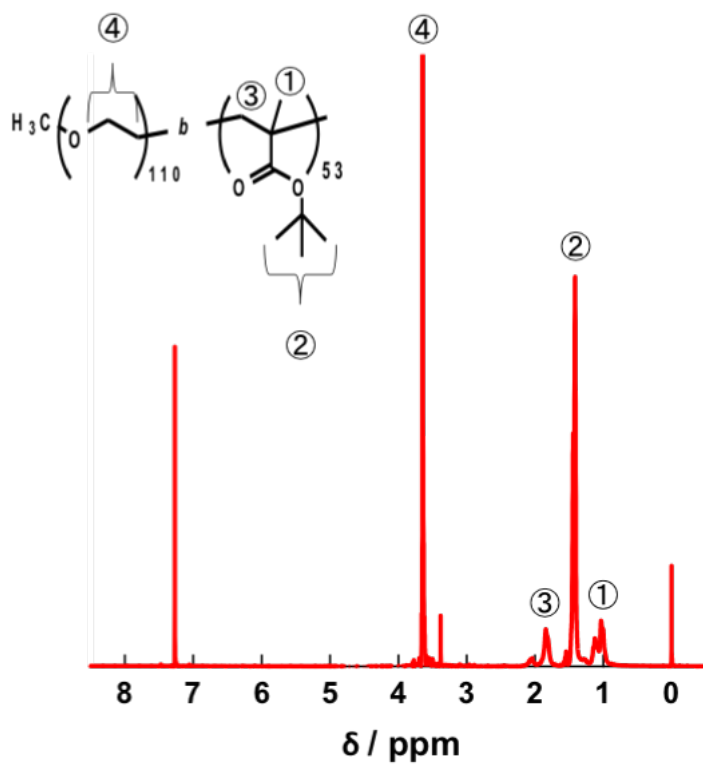

Figure S2.  $^1\text{H-NMR}$  spectrum of PEG-*b*-PtBMA in  $\text{CDCl}_3$ .
